# Supplementary material for: Correlation between patients’ reasons for encounters/health problems and population density in Japan: a systematic review of observational studies coded by the International Classification of Health Problems in Primary Care (ICHPPC) and the International Classification of Primary care (ICPC)
Source: BMC Fam Pract. 2017 Sep 13;18:87. doi: 10.1186/s12875-017-0658-5 (PMC5598053; doi:10.1186/s12875-017-0658-5)
Supplement: Additional file 1: — Table S1. Details of included studies. (XLSX 18 kb) [file 12875_2017_658_MOESM1_ESM.xlsx]

## Sheet: Table4
Table S1 (Additional file 1)
Year of publication	Author	Setting	Study period (y)	Number of facilities	Total number of patients	Total number of encounters	Total number of RFEs	Total number of health problems	Population density (Number of residents/Km2)	Proportion of “non-internal medicine-related” RFEs among the top 20 RFEs (%)	Proportion of “non-internal medicine-related” health problems among the top 20 health problems (%)	Classification	Primary outcome measure	Distinction between RFEs in fisrt and in periodic visit/ acute and chronic health problems	Quality of coding	Prospective or retrospective	Number of evaluators
1984	Miyahara16	Rural clinic	1	1	1105	No data	No data	3977	112.5	No data	No data	ICHPPC	Health problems	Combined	No description	No description	1
1985	Toguchi et al17	Rural clinic Rural hosptal	1 week	20 clinics 4 hospitals	1830	1830	No data	No data	1105	First visit: 4.8	No data	ICPC	RFEs	Only RFEs in first visit	Discussion by two evaluator	Prospective	No description
1985	Taketazu18	Rural clinic	6 months	1	No data	6471	No data	13503	70.89	No data	All: 32	ICHPPC-2 -Defined	Health problems	Combined	No description	Prospective	1
1988	Narato19	Rural clinic	1	1	No data	18786	No data	31401	50.93	No data	All: 27.9	ICHPPC-2 -Defined	Health problems	Combined	No description	Prospective	1
1990	Yamada20	Rural clinic	1	1	230	No data	602	700	18.6	No data	Chronic: 3.0 All: 47.2	ICHPPC-2 -Defined	RFEs Health problems	Discriminated	No description	Prospective	1
1991	Ochi21	Rural clinic	3	1	No data	17840	No data	20843	45.76	No data	All: 25.5	ICHPPC-2 -Defined	Health problems	Combined	No description	Retrospective	1
1992	Kawamoto22	Rural clinic	1	1	No data	2406	No data	3263	147.39	No data	Acute: 45.7 Chronic: 39.9	ICHPPC-2 -Defined	Health problems	Discriminated	No description	Prospective	1
1992	Shiraishi et al.23	Urban hospital Urban clinic rural clinic	2 4 months 2	1 1 1	No data	No data	No data	17519 7,207 61,916	No data 11,324.49 60.56	No data	All: 17.2 All: 28.5 All: 17.5	ICHPPC-2 -Defined	Health problems	Combined	Using "Diagnosis Cluster"	Prospective Retrospective Prospective	No description
1994	Shigemoto24	Urban clinic	2	1	No data	5816	No data	31056	1199.7	No data	All: 11.4	ICHPPC-2 -Defined	Health problems	Combined	No description	Prospective	1
1994	Kawamoto25	Rural clinic	1	1	306	1182	No data	1280	135.02	No data	Acute: 47.4 Chronic: 39.2	ICHPPC-2 -Defined	RFEs Health problems	Discriminated	No description	Prospective	1
1994	Kunori26	Rural clinic	10 months	1	697	2692	No data	2692	23.99	No data	All: 14.9	ICHPPC-2 -Defined	Health problems	Combined	No description	Prospective	1
1997	Yamada et al.27	Rural clinic	1	1	1931	16659	20418	751	16.74	All: 35	Acute: 24 Chronic: 33	ICPC	RFEs Health problems	Discriminated	No description	Prospective	1
1998	Waza et al.28	University hospital’s affiliated primary care clinic	1	1	No data	7803	10695	No data	629.37	All: 15.8 First visit: 12.5 Periodic visit: 23.6	No data	ICPC	RFEs Health problems	Only RFEs was discriminated	Conference for integration of coding	Prospective	10
2000	Yamada et al.29	Rural clinic	1	5	4495	43137	15,493 Only first visit	67499	15	First visit: 24.5	Acute: 20.9 Chronic: 37.9	ICPC	RFEs Health problems	Discriminated	Training for coding	Prospective	7
2000	Yamada et al.30	Rural clinic	1	5	4495	No data	No data	No data	15	No data	No data	ICPC	RFEs Health problems	No data	Training for coding	Prospective	7
2012	Morita et al.31	Rural clinic	1	1	457	8596	108 Only first visit	52 Only chronic Health problems	26.45	First visit: 41.4	Chronic: 31.9	ICPC-2	RFEs Health problems	Discriminated	No description	Prospective	1
2012	Kisa et al.32	Rural clinic	1 month	4	No data	2773	No data	16261	No description about magisterial district	No data	All: 31.6	ICPC-2	Health problems	combined	No description	Retrospective	No description
ICHPPC: International Classification of Health Problems in Primary Care ICPC: International Classification of Primary Care RFEs: reasons for encounter
